# Supplementary material
Source: HighWire-hosted journal article supplement (https://jech.bmj.com/content/77/1/17)
Supplement: inline-supplementary-material-1 [file inline-supplementary-material-1.pdf]

**Supplementary File:***Supplementary File 1: Results for the difference-in-difference analysis over time for road traffic collisions*

| <b>Site</b>                      | <b>IRR (95% CI)</b> |
|----------------------------------|---------------------|
| Control site (City centre)       | 1.01 (0.81,1.26)    |
| Control site (Metropolitan area) | 0.97 (0.81,1.16)    |
| Matched control                  | 0.90 (0.64,1.27)    |

CI: Confidence Interval; IRR: Incidence Rate Ratio.

*Supplementary File 2: Results for the difference-in-difference analysis over time for road traffic casualties*

| <b>Site</b>                      | <b>IRR (95% CI)</b> |
|----------------------------------|---------------------|
| Control site (City centre)       | 1.02 (0.84,1.25)    |
| Control site (Metropolitan area) | 0.96 (0.82,1.12)    |
| Matched control                  | 0.84 (0.62,1.15)    |

CI: Confidence Interval; IRR: Incidence Rate Ratio.

Supplementary File 3: Mean traffic speed over 24 hour period at pre-implementation, 1 and 3 years post-implementation

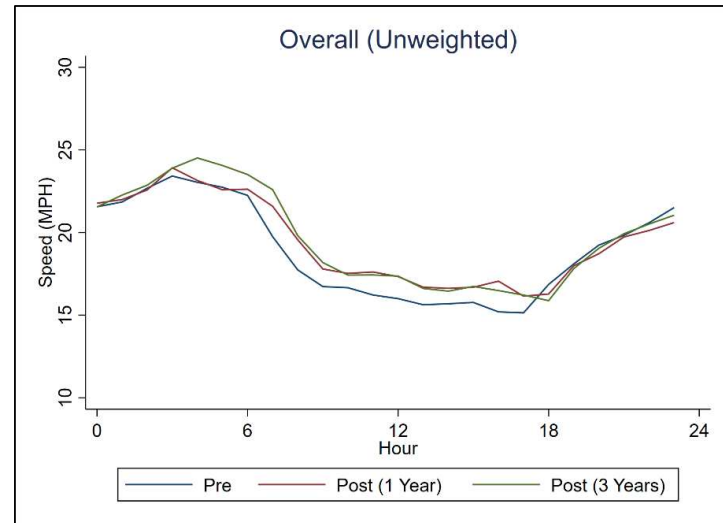

Supplementary File 4: Mean difference in traffic speed at 1 and 3 years post-implementation

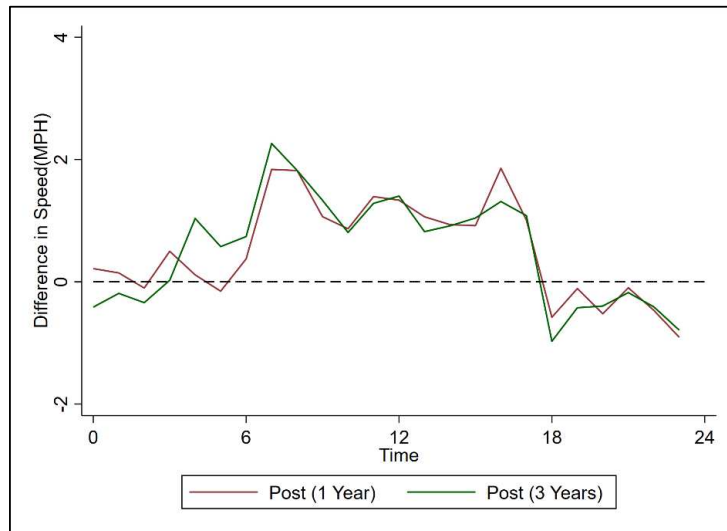

*Supplementary File 5: Data Availability*

The table below shows the data available for each intervention street for traffic speed and volume pre-implementation, year 1 and year 3 post-implementation periods.

| Street                     | Speed              |                            |                             | Volume             |                            |                             |
|----------------------------|--------------------|----------------------------|-----------------------------|--------------------|----------------------------|-----------------------------|
|                            | Pre-implementation | 1 year post-implementation | 3 years post-implementation | Pre-implementation | 1 year post-implementation | 3 years post-implementation |
| Chichester Street          | ✓                  | ✓                          | ✓                           | ✓                  | ✓                          | ✓                           |
| Donegall Place             | ✓                  | ✓                          | ✓                           | ✓                  | ✓                          | ✓                           |
| Donegall Street            | ✓                  | ✓                          | ✓                           | ✓                  | ✓                          | ✓                           |
| Howard Street              | ✓                  | ✓                          | ✓                           | ✓                  | ✓                          | ✓                           |
| May Street                 | ✓                  | ✓                          | ✓                           | ✓                  | ✓                          | ✓                           |
| Queen Street               | ✓                  | ✓                          | ✓                           | ✓                  | ✓                          | ✓                           |
| Royal Avenue               | ✓                  | ✓                          | ✓                           | ✓                  | ✓                          | ✓                           |
| Wellington Place           | ✓                  | ✓                          | ✓                           | ✓                  | ✓                          | ✓                           |
| York Street                | ✓                  | ✓                          | ✓                           | ✓                  | ✓                          | ✓                           |
| High Street                | ✓                  | ✓                          | ✓                           | X                  | ✓                          | ✓                           |
| North Street               | ✓                  | X                          | ✓                           | ✓                  | ✓                          | ✓                           |
| College Ave Millifield     | ✓                  | X                          | X                           | ✓                  | X                          | X                           |
| Dunbar Link                | ✓                  | X                          | X                           | ✓                  | X                          | X                           |
| Royal Ave Control          | ✓                  | X                          | X                           | ✓                  | X                          | X                           |
| Overall (Unweighted)       | ✓                  | ✓                          | ✓                           | X                  | X                          | X                           |
| College Ave                | ✓                  | X                          | X                           | X                  | X                          | X                           |
| College Ave two            | ✓                  | X                          | X                           | X                  | X                          | X                           |
| Victoria St                | ✓                  | X                          | X                           | X                  | X                          | X                           |
| Victoria St Carriageway    | ✓                  | X                          | X                           | X                  | X                          | X                           |
| Victoria St at Mboro       | ✓                  | X                          | X                           | X                  | X                          | X                           |
| College Ave City bounc     | X                  | X                          | X                           | ✓                  | X                          | X                           |
| College Ave College Square | X                  | X                          | X                           | ✓                  | X                          | X                           |
| Overall                    | ✓                  | ✓                          | ✓                           | ✓                  | ✓                          | ✓                           |
